# Supplementary material
Source: PubMed Central journal article supplement (PMC298765)
Supplement: pnas_0337479100v2_1.pdf [file pnas_0337479100v2_1.pdf]

## Genes repressed in rabbit ileal loops

### Protein synthesis

| Gene Description                        | Gene ID |
|-----------------------------------------|---------|
| ribosomal protein L28 (rpmB)            | VC0218  |
| ribosomal protein L33 (rpmG)            | VC0219  |
| ribosomal protein L11 (rplK)            | VC0324  |
| ribosomal protein L1 (rplA)             | VC0325  |
| ribosomal protein L10 (rplJ)            | VC0326  |
| ribosomal protein L7/L12 (rplL)         | VC0327  |
| ribosomal protein S12 (rpsL)            | VC0359  |
| ribosomal protein S7 (rpsG)             | VC0360  |
| ribosomal protein S6 (rpsF)             | VC0366  |
| ribosomal protein S18 (rpsR)            | VC0368  |
| ribosomal protein L9 (rplI)             | VC0369  |
| ribosomal protein L21 (rplU)            | VC0435  |
| ribosomal protein L27 (rpmA)            | VC0436  |
| ribosomal protein S21 (rpsU)            | VC0520  |
| ribosomal protein S16 (rpsP)            | VC0561  |
| ribosomal protein L19 (rplS)            | VC0564  |
| ribosomal protein L13 FRAMESHIFT (rplM) | VC0570  |
| ribosomal protein S9 (rpsI)             | VC0571  |
| ribosomal protein S15 (rpsO)            | VC0646  |
| ribosomal protein S20 (rpsT)            | VC0679  |
| ribosomal protein L25 (rplY)            | VC1640  |
| ribosomal protein S1 (rpsA)             | VC1915  |
| ribosomal protein S2 (rpsB)             | VC2260  |
| ribosomal protein L17 (rplQ)            | VC2570  |
| ribosomal protein S4 (rpsD)             | VC2572  |
| ribosomal protein S11 FRAMESHIFT (rpsK) | VC2573  |
| ribosomal protein S13 (rpsM)            | VC2574  |
| ribosomal protein L15 (rplO)            | VC2577  |
| ribosomal protein L30 (rpmD)            | VC2578  |
| ribosomal protein S5 (rpsE)             | VC2579  |
| ribosomal protein L18 (rplR)            | VC2580  |
| ribosomal protein L6 (rplF)             | VC2581  |
| ribosomal protein S8 (rpsH)             | VC2582  |
| ribosomal protein S14 (rpsN)            | VC2583  |
| ribosomal protein L5 (rplE)             | VC2584  |
| ribosomal protein L24 (rplX)            | VC2585  |
| ribosomal protein L14 (rplN)            | VC2586  |
| ribosomal protein S17 (rpsQ)            | VC2587  |
| ribosomal protein L29 (rpmC)            | VC2588  |
| ribosomal protein L16 (rplP)            | VC2589  |
| ribosomal protein S3 (rpsC)             | VC2590  |
| ribosomal protein L22 (rplV)            | VC2591  |
| ribosomal protein S19 (rpsS)            | VC2592  |

|                                                           |         |
|-----------------------------------------------------------|---------|
| ribosomal protein L2 (rplB)                               | VC2593  |
| ribosomal protein L23 (rplW)                              | VC2594  |
| ribosomal protein L4 (rplD)                               | VC2595  |
| ribosomal protein L3 (rplC)                               | VC2596  |
| ribosomal protein S10 (rpsJ)                              | VC2597  |
| ribosomal protein L31 (rpmE)                              | VC2679  |
| ribosomal protein L35 (rpmI)                              | VCA0289 |
| ribosomal protein L20 (rplT)                              | VCA0290 |
| ribosomal large subunit pseudouridine synthase A (rluA-1) | VC2505  |
| glycyl-tRNA synthetase, beta chain (glyS)                 | VC0020  |
| glycyl-tRNA synthetase, alpha chain (glyQ)                | VC0021  |
| alanyl-tRNA synthetase (alaS)                             | VC0545  |
| tRNA (guanine-N1)-methyltransferase                       | VC0563  |
| tyrosyl-tRNA synthetase (tyrS)                            | VC0631  |
| S-adenosylmethionine:tRNA ribosyltransferase              | VC0739  |
| queuine tRNA-ribosyltransferase (tgt)                     | VC0741  |
| prolyl-tRNA synthetase (proS)                             | VC0875  |
| leucyl-tRNA synthetase (leuS)                             | VC0956  |
| glutaminyl-tRNA synthetase (glnS)                         | VC0997  |
| methionyl-tRNA synthetase (metG)                          | VC1036  |
| seryl-tRNA synthetase (serS)                              | VC1110  |
| aspartyl-tRNA synthetase (aspS)                           | VC1166  |
| phenylalanyl-tRNA synthetase, alpha chain (pheS)          | VC1219  |
| phenylalanyl-tRNA synthetase, beta chain (pheT)           | VC1220  |
| asparaginyl-tRNA synthetase (asnS)                        | VC1297  |
| glutamyl-tRNA synthetase (gltX)                           | VC2214  |
| valyl-tRNA synthetase (valS)                              | VC2503  |
| threonyl-tRNA synthetase (thrS)                           | VCA0287 |
| elongation factor Tu (tufB)                               | VC0321  |
| elongation factor G (fusA)                                | VC0361  |
| elongation factor TU (tufA)                               | VC0362  |
| elongation factor P family protein                        | VC1209  |
| elongation factor Ts (tsf)                                | VC2259  |
| elongation factor G (fusA)                                | VC2342  |
| peptide chain release factor 2, FRAMESHIFT                | VC0663  |
| initiation factor IF-2 (infB)                             | VC0643  |
| initiation factor IF-1 (infA)                             | VC1737  |
| initiation factor IF3, POINTMUTATION                      | VCA0288 |

## Protein Fate

|                                    |         |
|------------------------------------|---------|
| chaperone protein HscA (hscA)      | VC0752  |
| chaperonin, 10 Kd subunit (groES)  | VCA0819 |
| chaperonin, 10 Kd subunit (groES)  | VC2665  |
| chaperonin, 60 Kd subunit (groEL)  | VCA0820 |
| chaperonin, 60 Kd subunit (groEL)  | VC2664  |
| 16 kDa heat shock protein A (ibpA) | VC0018  |
| heat shock protein HtpG (htpG)     | VC0985  |
| heat shock protein GrpE (grpE)     | VC0854  |

|                                                            |        |
|------------------------------------------------------------|--------|
| dnaK suppressor protein (dksA)                             | VC0596 |
| dnaK protein (dnaK) { <i>Vibrio cholerae</i> }             | VC0855 |
| DnaK-related protein                                       | VC1374 |
| peptidyl-prolyl cis-trans isomerase, FKBP-type (fkpA)      | VC0354 |
| peptidyl-prolyl cis-trans isomerase, FKBP-type (fkIB)      | VC2568 |
| trigger factor (tig) { <i>Escherichia coli</i> }           | VC1923 |
| preprotein translocase, SecE subunit (secE)                | VC0322 |
| preprotein translocase, SecG subunit (secG)                | VC0640 |
| preprotein translocase, SecY subunit (secY)                | VC2576 |
| preprotein translocase, SecA subunit (secA)                | VC2394 |
| protein-export membrane protein SecD (secD)                | VC0743 |
| protein-export membrane protein SecF (secF)                | VC0744 |
| protein-transport protein SecB (secB)                      | VC2653 |
| peptide methionine sulfoxide reductase (msrA)              | VC2549 |
| polypeptide deformylase (def)                              | VC0046 |
| thiol:disulfide interchange protein (tpcG)                 | VC0034 |
| clpB protein (clpB) { <i>Escherichia coli</i> }            | VC0711 |
| protease HslVU, ATPase subunit HslU                        | VC2674 |
| protease HslVU, subunit HslV (hslV)                        | VC2675 |
| trypsin, putative { <i>Mus musculus</i> }                  | VC1649 |
| protease, putative { <i>Escherichia coli</i> }             | VC0717 |
| ATP-dependent protease LA (lon) { <i>Vibrio cholerae</i> } | VC1920 |
| ATP-dependent Clp protease, ATP-binding subunit (clpX)     | VC1921 |
| ATP-dependent Clp protease, proteolytic subunit (clpP)     | VC1922 |
| oligopeptidase A (prC)                                     | VC0188 |
| peptidase B (pepB) { <i>Escherichia coli</i> }             | VC0755 |
| methionine aminopeptidase (map)                            | VC2261 |
| aminopeptidase A/I (pepA)                                  | VC2501 |

### Transporter and binding protein

|                                                       |         |
|-------------------------------------------------------|---------|
| ABC transporter, ATP-binding protein                  | VC0698  |
| ABC transporter, ATP-binding protein                  | VC0589  |
| ABC transporter, ATP-binding protein                  | VC2520  |
| spermidine/putrescine ABC transporter (potD-2)        | VC1425  |
| spermidine/putrescine ABC transporter (potA)          | VC1428  |
| spermidine/putrescine ABC transporter (potD-1)        | VC1424  |
| tyrosine-specific transport protein (tyrP)            | VCA0772 |
| multidrug resistance protein, putative                | VC1409  |
| ferric vibriobactin-binding protein (irgA)            | VC0475  |
| vitamin B12 receptor (btuB)                           | VC0156  |
| sodium/alanine symporter                              | VC2356  |
| formate transporter 1, putative                       | VC1695  |
| long-chain fatty acid transport protein (fadL-3)      | VCA0862 |
| long-chain fatty acid transport protein (fadL-2)      | VC1043  |
| lipopolysaccharide/O-antigen transport protein (rfbH) | VC0246  |

## Cellular process

|                                      |        |
|--------------------------------------|--------|
| antioxidant, AhpC/Tsa family         | VC0731 |
| superoxide dismutase, Fe (sodB)      | VC2045 |
| septum site-determining protein MinD | VC1960 |
| cell division protein FtsJ (ftsJ)    | VC0636 |

## Energy Metabilism

|                                                               |         |
|---------------------------------------------------------------|---------|
| ATP synthase F1, epsilon subunit (atpC)                       | VC2763  |
| ATP synthase F1, beta subunit (atpD)                          | VC2764  |
| ATP synthase F1, gamma subunit (atpG)                         | VC2765  |
| ATP synthase F1, alpha subunit (atpA)                         | VC2766  |
| ATP synthase F1, delta subunit (atpH)                         | VC2767  |
| ATP synthase F0, B subunit (atpF)                             | VC2768  |
| ATP synthase F0, C subunit (atpE)                             | VC2769  |
| ATP synthase F0, A subunit (atpB)                             | VC2770  |
| ATP synthase protein I (atpI)                                 | VC2771  |
| NADH:ubiquinone oxidoreductase, Na translocating (nqrF)       | VC2290  |
| NADH:ubiquinone oxidoreductase, Na translocating (nqrE)       | VC2291  |
| NADH:ubiquinone oxidoreductase, Na translocating (nqrD)       | VC2292  |
| NADH:ubiquinone oxidoreductase, Na translocating (nqrC)       | VC2293  |
| NADH:ubiquinone oxidoreductase, Na translocating (nqrB)       | VC2294  |
| NADH:ubiquinone oxidoreductase, Na translocating (nqrA)       | VC2295  |
| cytochrome d ubiquinol oxidase, subunit II (cydB-1)           | VC1843  |
| cytochrome d ubiquinol oxidase, subunit I (cydA-1)            | VC1844  |
| cytochrome c5 {Azotobacter vinelandii}                        | VC0168  |
| cytochrome c4 {Pseudomonas stutzeri}                          | VC0112  |
| ubiquinol--cytochrome c reductase, iron-sulfur subunit (petA) | VC0573  |
| Flavodoxin 1 (fldA) {Escherichia coli}                        | VC2099  |
| thioredoxin (trxA) {Escherichia coli}                         | VC0306  |
| thioredoxin 2 (trxC) {Escherichia coli}                       | VCA0752 |
| thioredoxin reductase (trxB)                                  | VC1182  |
| NADH dehydrogenase (ndh)                                      | VC1890  |
| Glutaredoxin (grxA)                                           | VC1146  |
| pyruvate dehydrogenase, E3 component (lpdA)                   | VC2412  |
| pyruvate dehydrogenase, E2 component (aceF)                   | VC2413  |
| pyruvate dehydrogenase, E1 component (aceE)                   | VC2414  |
| 2-oxoglutarate dehydrogenase, E1 component (sucA)             | VC2087  |
| transaldolase B (talB)                                        | VCA0623 |
| glucose-6-phosphate 1-dehydrogenase (zwf)                     | VCA0896 |
| 6-phosphogluconate dehydrogenase, decarboxylating (gnd)       | VCA0898 |
| trehalose-6-phosphate hydrolase (treC)                        | VC0911  |
| malate oxidoreductase, putative                               | VC2681  |
| acetate kinase (ackA) {Escherichia coli}                      | VCA0235 |
| acetate kinase (ackA) {Escherichia coli}                      | VC1098  |
| phosphate acetyltransferase (pta)                             | VC1097  |
| iron-containing alcohol dehydrogenase family protein RfbM     | VC0250  |

## Regulatory function

|                                                                     |        |
|---------------------------------------------------------------------|--------|
| factor-for-inversion stimulation protein (fis)                      | VC0290 |
| gluconate utilization system gnt-I transcriptional repressor (gntR) | VC0289 |
| GTP-binding protein TypA (typA)                                     | VC2744 |
| pyruvate dehydrogenase complex repressor (pdhR)                     | VC2415 |

## Transcription

|                                                   |        |
|---------------------------------------------------|--------|
| DNA-directed RNA polymerase, beta subunit         | VC0328 |
| DNA-directed RNA polymerase, beta' subunit        | VC0329 |
| DNA-directed RNA polymerase, alpha subunit        | VC2571 |
| DNA-directed RNA polymerase, omega subunit        | VC2709 |
| RNA polymerase-associated protein HepA            | VC2506 |
| RNA polymerase sigma factor RpoD (rpoD)           | VC0517 |
| ATP-dependent RNA helicase SrmB (srmB)            | VC0660 |
| transcription antitermination protein NusG (nusG) | VC0323 |
| transcription elongation factor GreA (greA)       | VC0634 |
| ribosome-binding factor A (rbfA)                  | VC0644 |
| 16S rRNA processing protein RimM (rimM)           | VC0562 |

## DNA metabolism

|                                          |        |
|------------------------------------------|--------|
| exodeoxyribonuclease III (xth)           | VC1860 |
| A/G-specific adenine glycosylase (mutY)  | VC0452 |
| ATP-dependent DNA helicase Rep (rep)     | VC0167 |
| recR protein, FRAMESHIFT (recR)          | VC1056 |
| DNA-binding protein HU (hupA)            | VC0273 |
| DNA gyrase, subunit A, FRAMESHIFT (gyrA) | VC1258 |
| primosomal replication protein N (priB)  | VC0367 |

## Purine, pyrimidines, nucleosides, and nucleotides

|                                                               |         |
|---------------------------------------------------------------|---------|
| uridylyl kinase (pyrH) {Escherichia coli}                     | VC2258  |
| uridine kinase (udk) {Escherichia coli}                       | VC1038  |
| purine nucleoside phosphorylase (deoD-2)                      | VCA0053 |
| purine nucleoside phosphorylase (deoD-1)                      | VC2347  |
| UTP--glucose-1-phosphate uridylyltransferase (galU)           | VC0395  |
| adenosine deaminase (add) {Escherichia coli}                  | VC2751  |
| cytidylate kinase (cmk) {Escherichia coli}                    | VC1916  |
| inosine-guanosine kinase (gsk)                                | VC1129  |
| adenylate kinase (adk) {Escherichia coli}                     | VC0986  |
| adenylosuccinate synthetase (purA)                            | VC2602  |
| ribonucleoside-diphosphate reductase, $\beta$ subunit (nrdB)  | VC1255  |
| ribonucleoside-diphosphate reductase, $\alpha$ subunit (nrdA) | VC1256  |

## Fatty acid and phospholipid metabolism

|                                                                      |        |
|----------------------------------------------------------------------|--------|
| acetyl-CoA carboxylase, carboxyl transferase $\alpha$ subunit (accA) | VC2244 |
| acetyl-CoA carboxylase, biotin carboxyl carrier protein (accB)       | VC0296 |

|                                                                     |         |
|---------------------------------------------------------------------|---------|
| acetyl-CoA carboxylase, biotin carboxylase (accC)                   | VC0295  |
| acetyl-CoA carboxylase, carboxyl transferase $\beta$ subunit (accD) | VC1000  |
| myo-inositol-monophosphatase                                        | VC0745  |
| (3R)-hydroxymyristoyl-(acyl-carrier-protein)dehydratase (fabZ)      | VC2249  |
| lipase, putative { <i>Aeromonas hydrophila</i> }                    | VCA0863 |
| 3-oxoacyl-(acyl-carrier-protein) synthase (fabF)                    | VC2019  |
| acyl carrier protein (acp)                                          | VC2020  |
| 3-oxoacyl-(acyl-carrier-protein) reductase (fabG)                   | VC2021  |
| malonyl Coa-acyl carrier protein transacylase (fabD)                | VC2022  |
| 3-oxoacyl-(acyl-carrier-protein) synthase (fabH-1)                  | VC2023  |
| 3-oxoacyl-(acyl-carrier-protein) synthase (fabB)                    | VC2109  |
| acyl protein synthase/acyl-CoA reductase RfbN                       | VC0251  |
| acyl carrier protein, putative { <i>Vibrio cholerae</i> }           | VC0248  |

### Cell envelope

|                                                                |        |
|----------------------------------------------------------------|--------|
| outer membrane protein OmpA (ompA) { <i>Vibrio cholerae</i> }  | VC2213 |
| outer membrane protein OmpH (ompH)                             | VC2251 |
| GDP-mannose 4,6-dehydratase (rfbD) { <i>Vibrio cholerae</i> }  | VC0243 |
| UDP-3-O-3-hydroxymyristoyl glucosamine N-acetransferase (firA) | VC2250 |
| lipoprotein, putative { <i>Escherichia coli</i> }              | VC1195 |
| inner membrane protein, 60 kDa (yidC)                          | VC0004 |
| peptidoglycan-associated lipoprotein                           | VC1835 |

### Amino acid biosynthesis

|                                                             |        |
|-------------------------------------------------------------|--------|
| 3-dehydroquinate dehydratase (aroQ)                         | VC0297 |
| shikimate kinase (aroK) { <i>Escherichia coli</i> }         | VC2629 |
| glutamate--ammonia ligase (glnA) { <i>Vibrio cholerae</i> } | VC2746 |
| aspartate aminotransferase (aspC)                           | VC1293 |
| Glutamate 5-kinase (proB)                                   | VC2274 |
| serine hydroxymethyltransferase (glyA)                      | VC0941 |
| N-acetylglutamate synthase (argA)                           | VC2316 |

### Biosynthesis of cofactor

|                                             |         |
|---------------------------------------------|---------|
| lipoic acid synthetase (lipA)               | VC0943  |
| lipoate-protein ligase B (lipB)             | VC0944  |
| uroporphyrin-III C-methyltransferase (cysG) | VC2561  |
| nicotinate phosphoribosyltransferase (pncB) | VCA0098 |
| thiamin biosynthesis protein Thil (thil)    | VC0894  |
| riboflavin synthase, beta subunit (ribH)    | VC2268  |

### Central intermediary metabolism

|                                                 |         |
|-------------------------------------------------|---------|
| agmatinase (speB) { <i>Escherichia coli</i> }   | VCA0814 |
| biosynthetic arginine decarboxylase (speA)      | VCA0815 |
| inorganic pyrophosphatase (ppa)                 | VC2545  |
| sulfate adenylate transferase, subunit 2 (cysD) | VC2560  |

|                                                               |        |
|---------------------------------------------------------------|--------|
| aminotransferase, class III/decarboxylase, groupII            | VC1625 |
| acetyltransferase RfbO, CysE/LacA/LpxA/NodL family, framshift | VC0252 |

### Unknown, hypothetical and conserved hypothetical

|                                             |         |
|---------------------------------------------|---------|
| GGDEF family protein                        | VC1376  |
| NifR3/Smm1 family protein                   | VC0291  |
| cyaY protein (cyaY)                         | VC0123  |
| methyltransferase-related protein           | VC0113  |
| rfbL protein (rfbL) {Vibrio cholerae}       | VC0249  |
| rfbG protein (rfbG) {Vibrio cholerae}       | VC0245  |
| hesB family protein                         | VC0750  |
| GTP-binding protein {Escherichia coli}      | VC2185  |
| GTP-binding protein LepA (lepA)             | VC2463  |
| glucose inhibited division protein A (gidA) | VC2775  |
| hypothetical protein                        | VC0314  |
| hypothetical protein                        | VC0569  |
| hypothetical protein                        | VC0713  |
| hypothetical protein                        | VC0740  |
| hypothetical protein                        | VC1201  |
| hypothetical protein                        | VC1375  |
| hypothetical protein                        | VC1738  |
| hypothetical protein                        | VC1739  |
| hypothetical protein                        | VC1924  |
| hypothetical protein                        | VC2098  |
| hypothetical protein                        | VC2753  |
| hypothetical protein                        | VCA0005 |
| hypothetical protein                        | VCA0652 |
| conserved hypothetical protein              | VC0114  |
| conserved hypothetical protein              | VC0115  |
| conserved hypothetical protein              | VC0127  |
| conserved hypothetical protein              | VC0134  |
| conserved hypothetical protein              | VC0453  |
| conserved hypothetical protein              | VC0519  |
| conserved hypothetical protein              | VC0641  |
| conserved hypothetical protein              | VC0742  |
| conserved hypothetical protein              | VC0770  |
| conserved hypothetical protein              | VC0962  |
| conserved hypothetical protein              | VC0977  |
| conserved hypothetical protein              | VC1055  |
| conserved hypothetical protein FRAMESHIFT   | VC1079  |
| conserved hypothetical protein              | VC1259  |
| conserved hypothetical protein              | VC1358  |
| conserved hypothetical protein              | VC2026  |
| conserved hypothetical protein              | VC2620  |
| conserved hypothetical protein              | VC2654  |
| conserved hypothetical protein              | VC2706  |
| conserved hypothetical protein FRAMESHIFT   | VC2716  |
| conserved hypothetical protein              | VC2735  |
| conserved hypothetical protein              | VC2736  |

conserved hypothetical protein  
conserved hypothetical protein

VCA0006  
VCA1021
